# Supplementary material
Source: PubMed Central journal article supplement (PMC6819224)

# Supplementary Figure 1

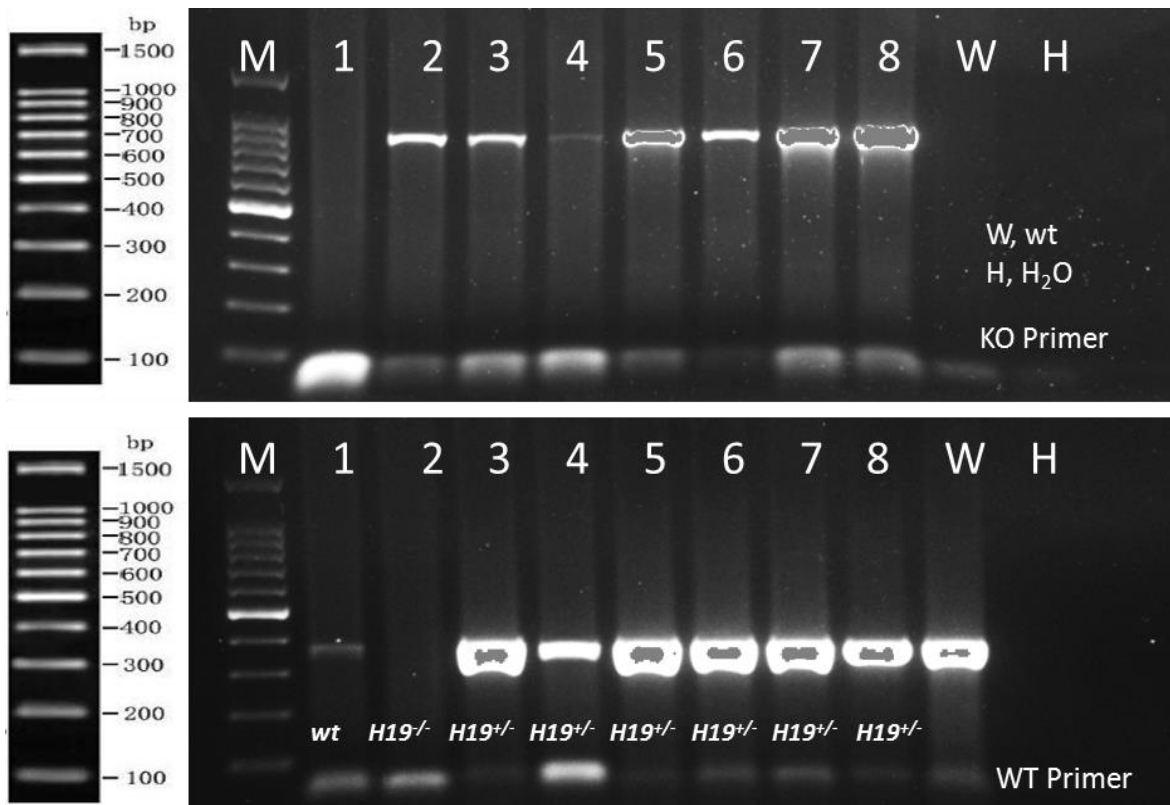

# Supplementary Figure 2

**A**

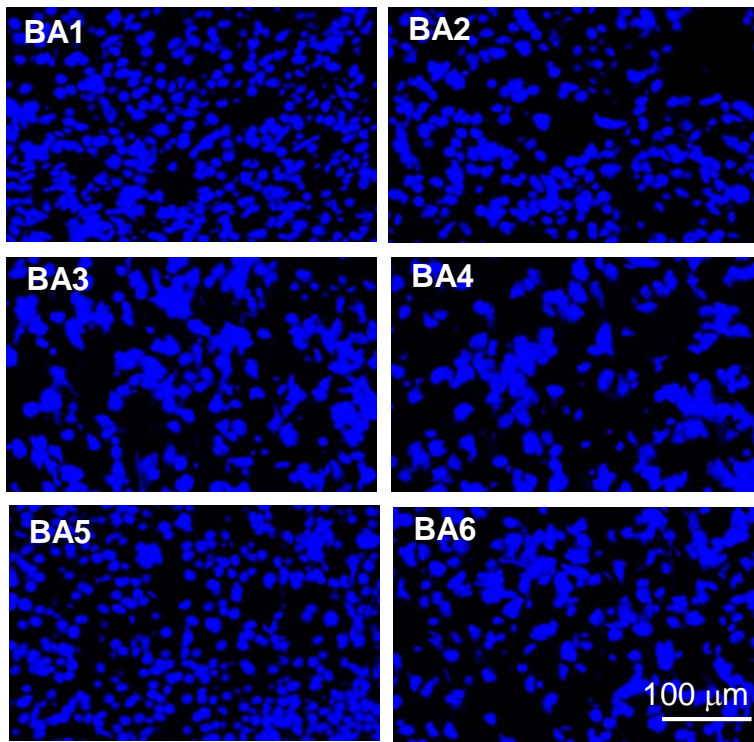

**B**

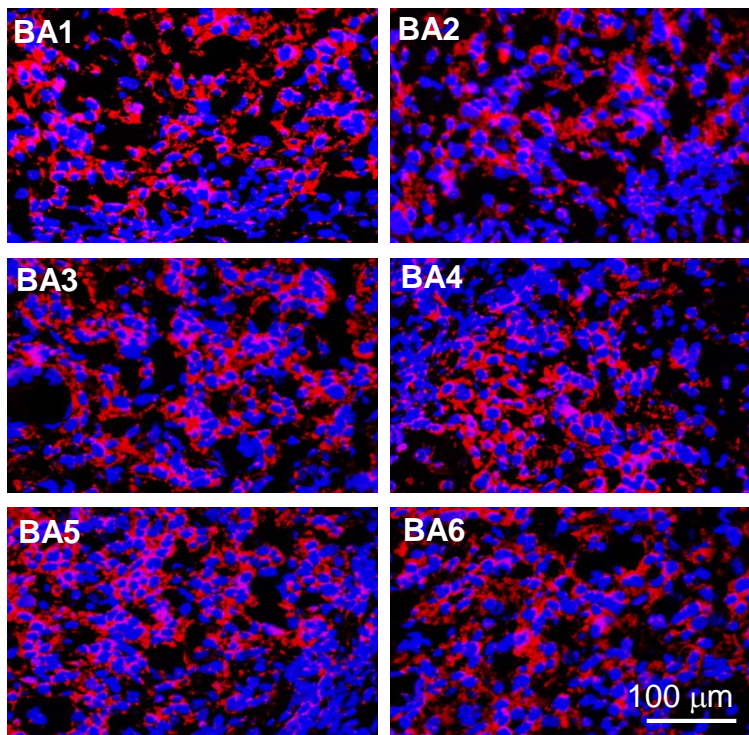

# Supplementary Figure 3

FITC staining control

---

HC

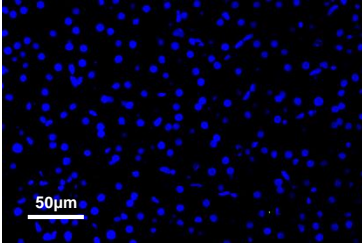

BA

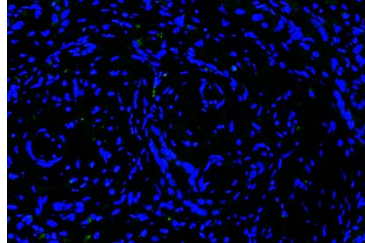

cy3 staining control

---

HC

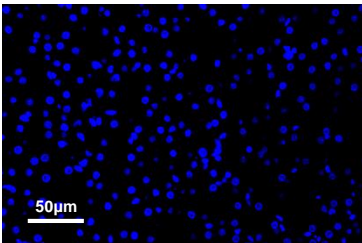

BA

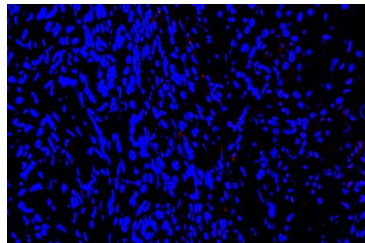

# Supplementary Figure 4

H19 and CK19 costaining

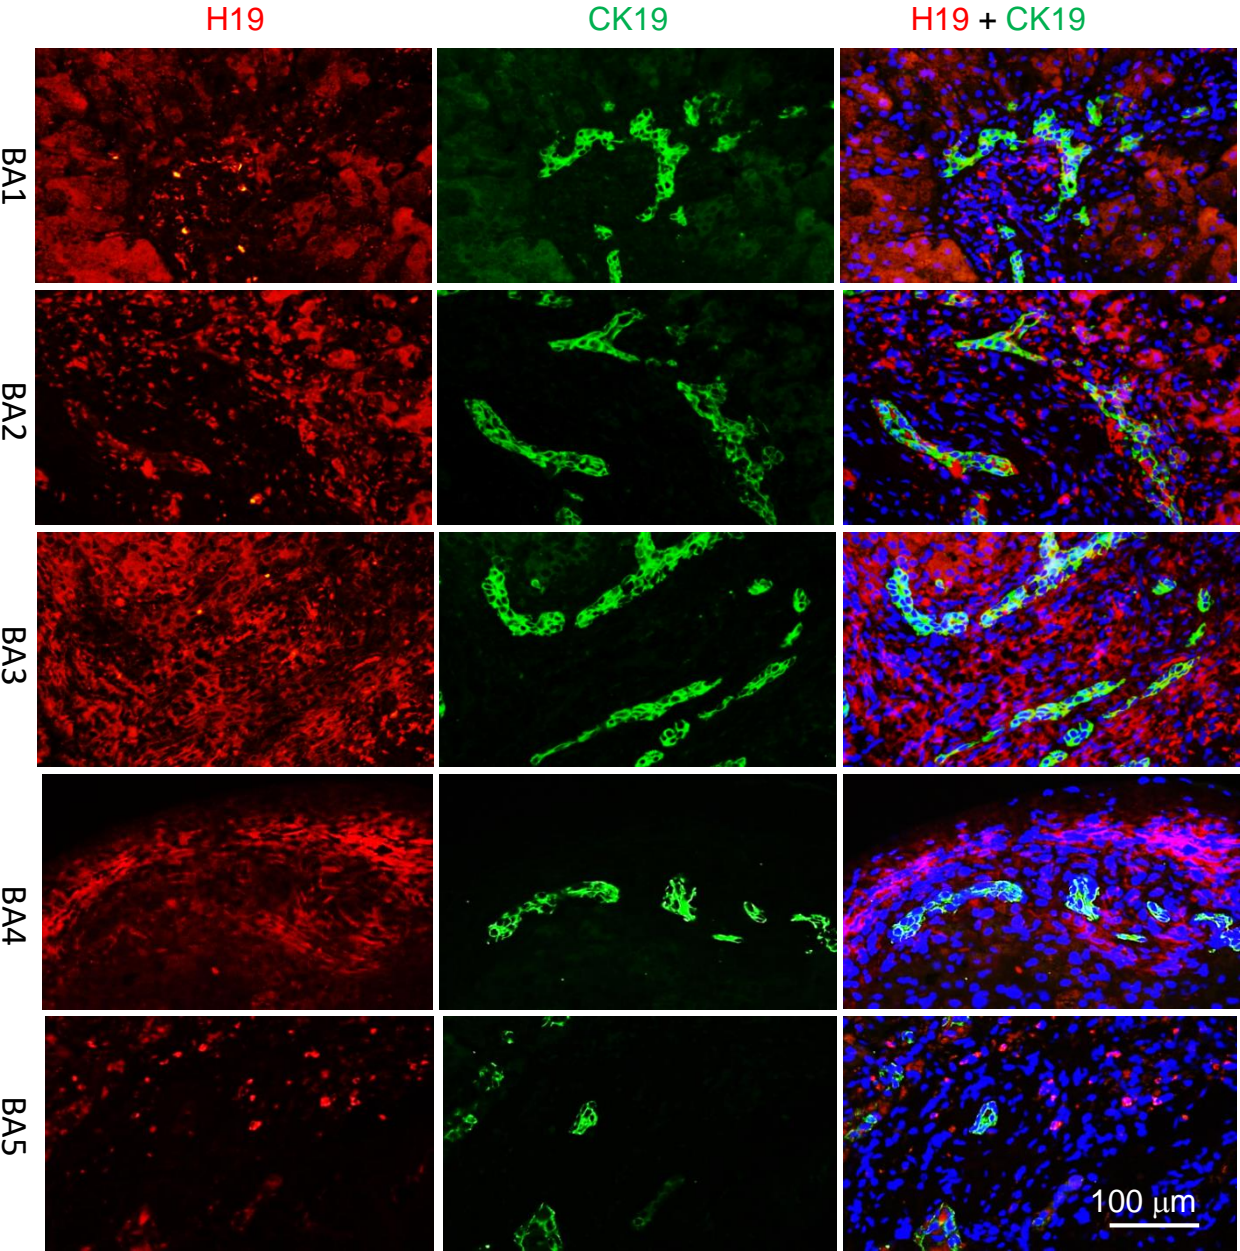

# Supplementary Figure 5

H19 and  $\alpha$ SMA costaining

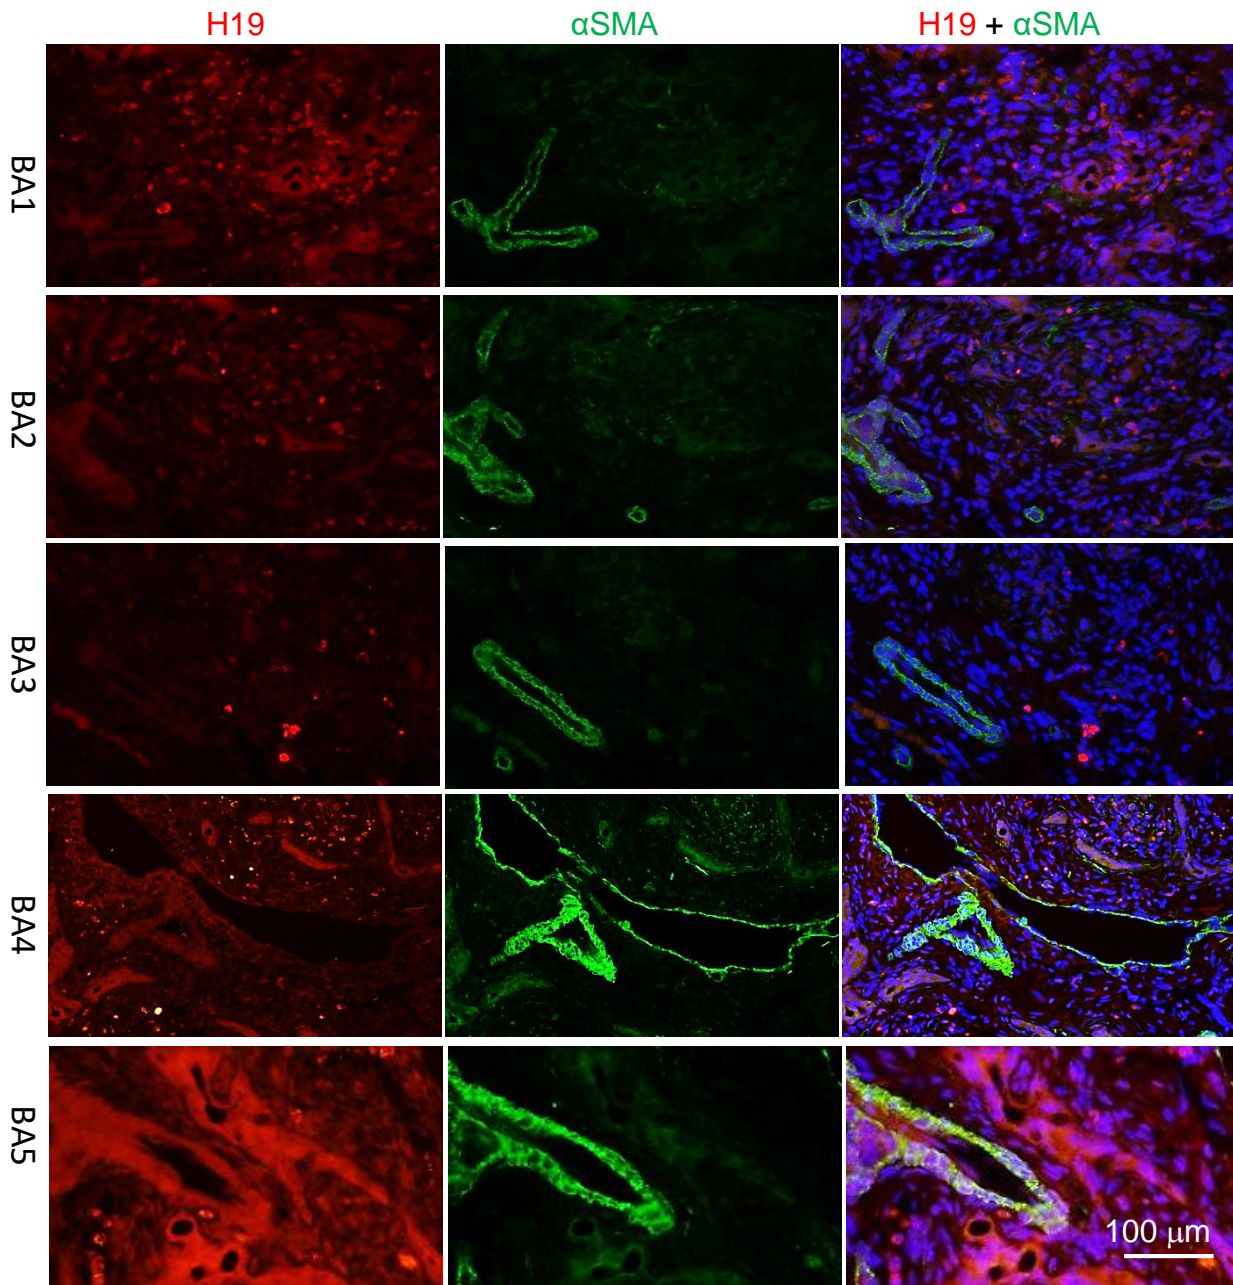

# Supplementary Figure 6

## Bile acid synthesis

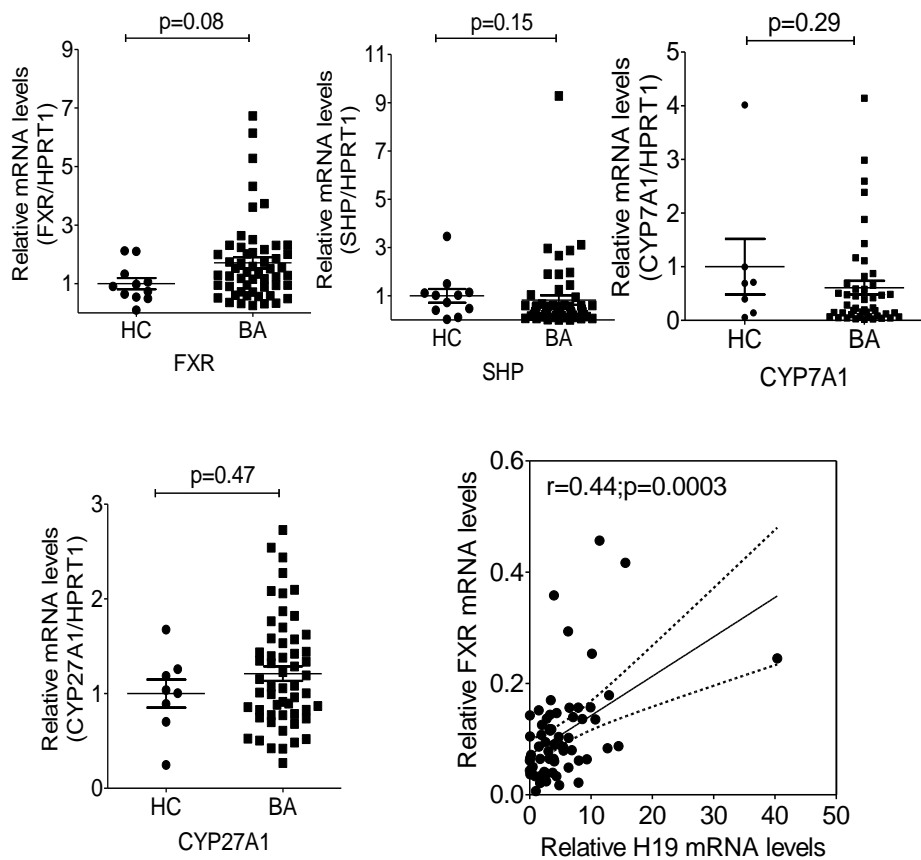

# Supplementary Figure 7

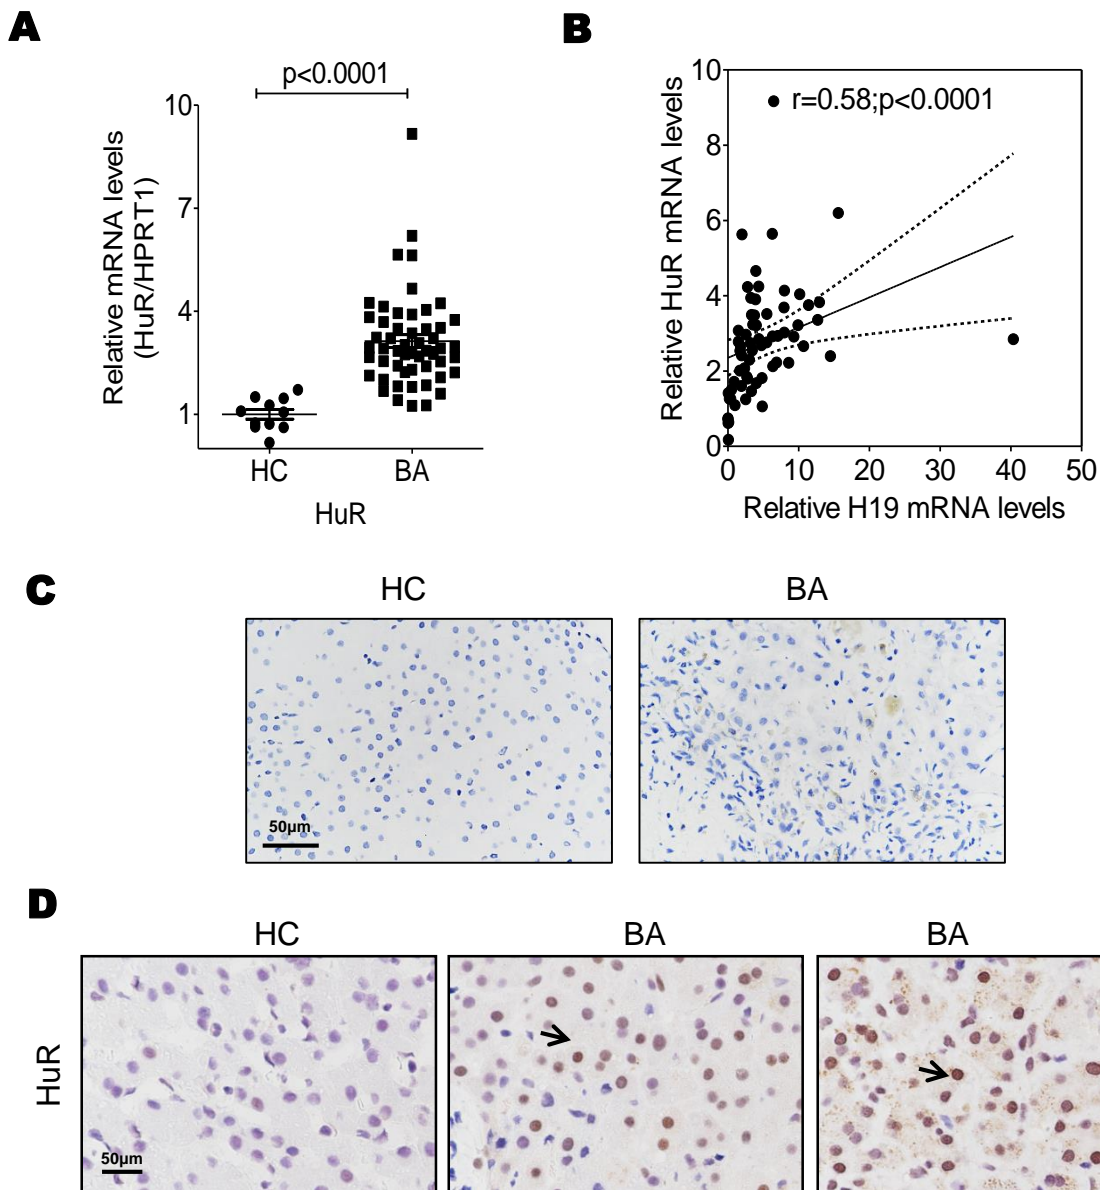

# Supplementary Figure 8

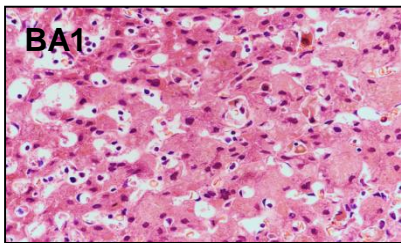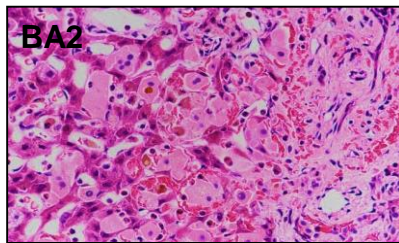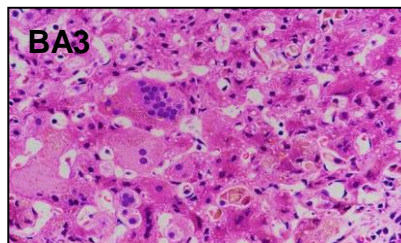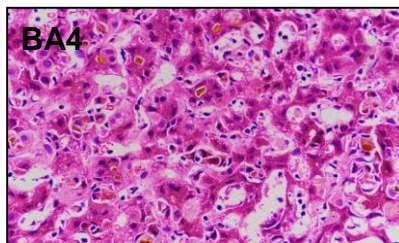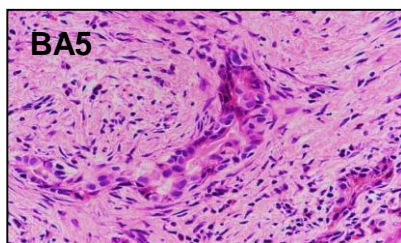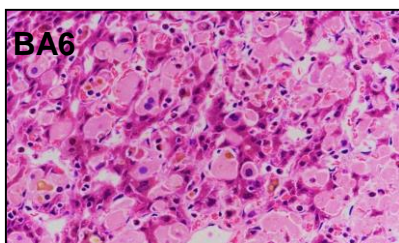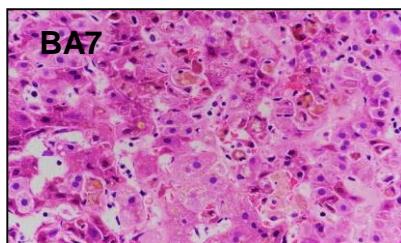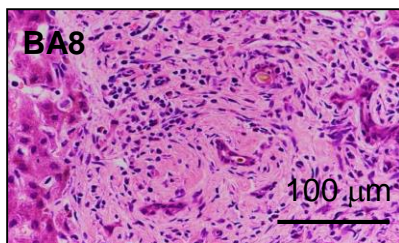



# Supplementary Figure 9

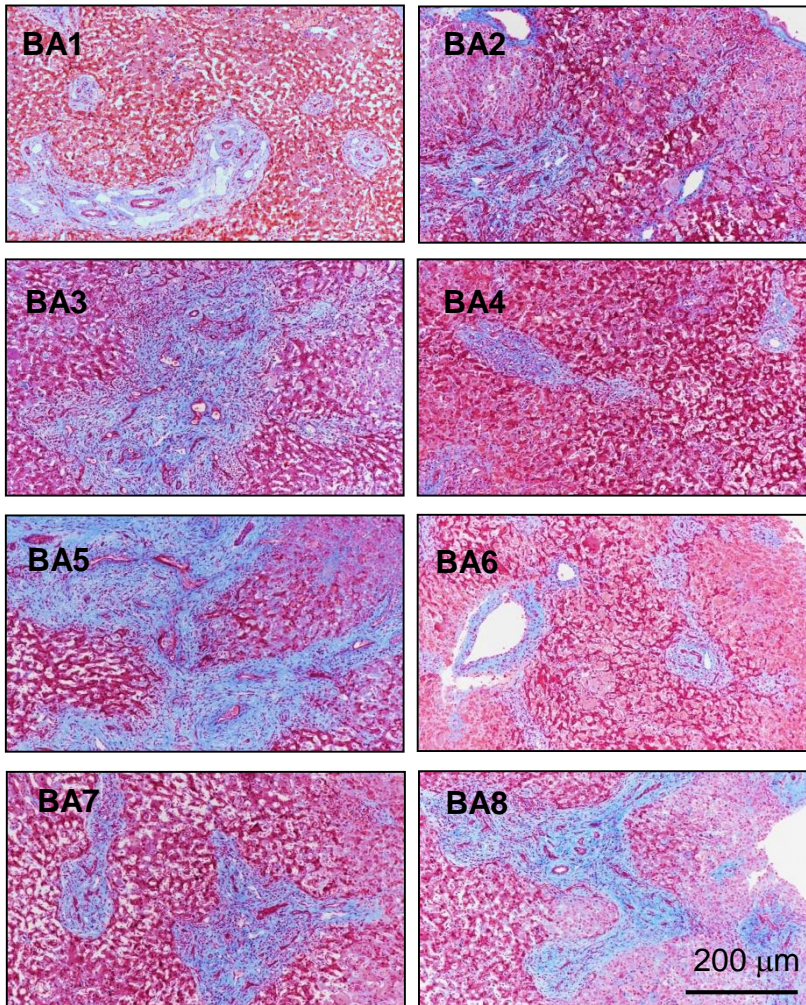

# Supplementary Figure 10

**A**

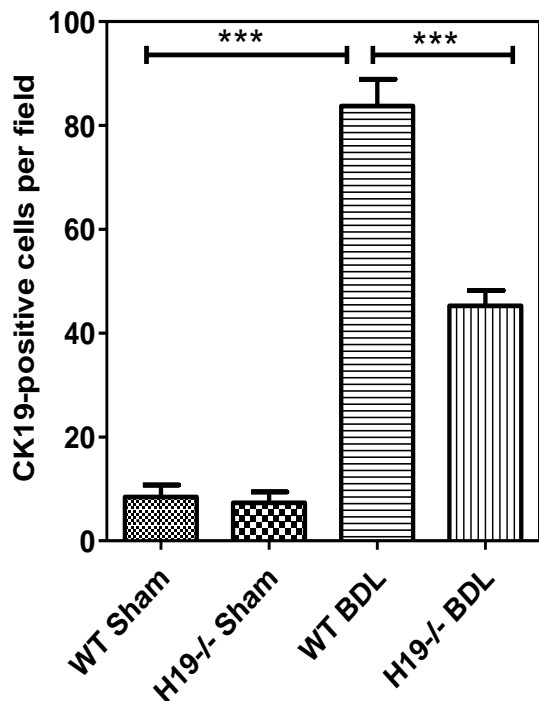

**B**

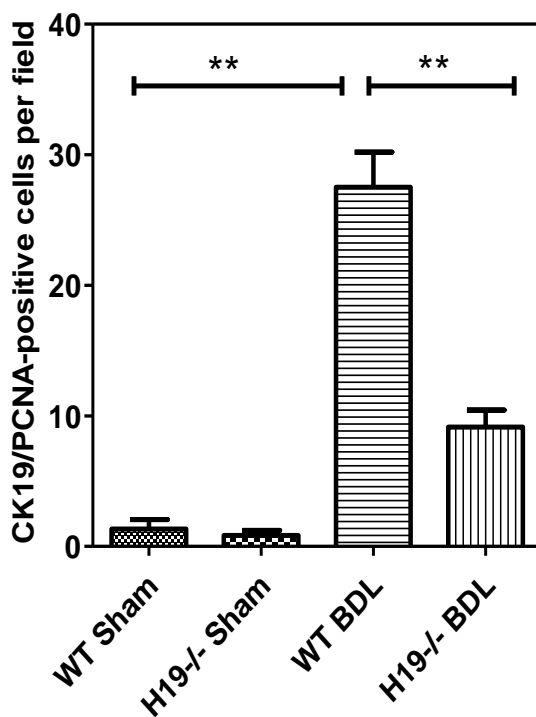

# Supplementary Figure 11

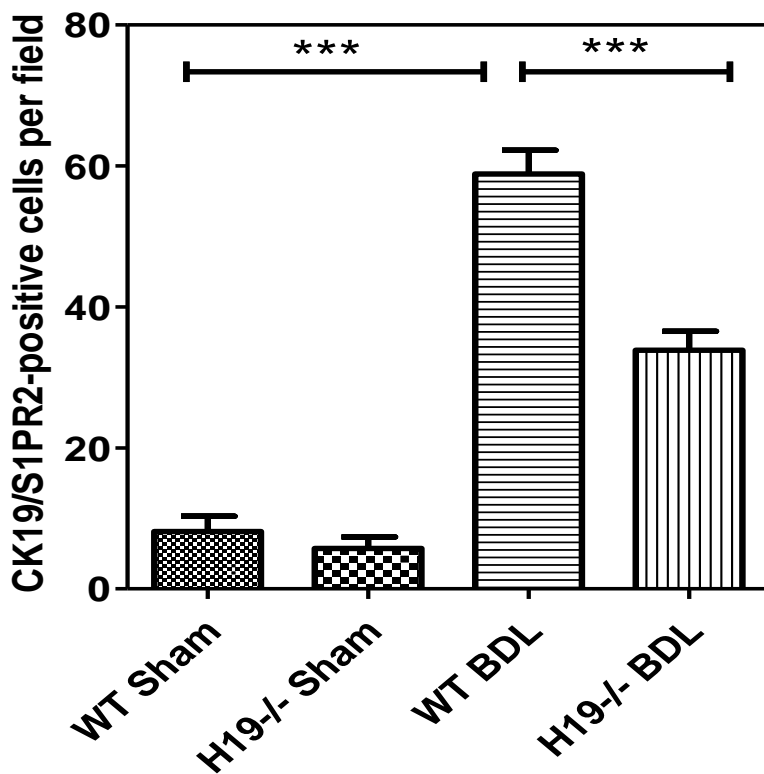

## Supplementary Figure 12

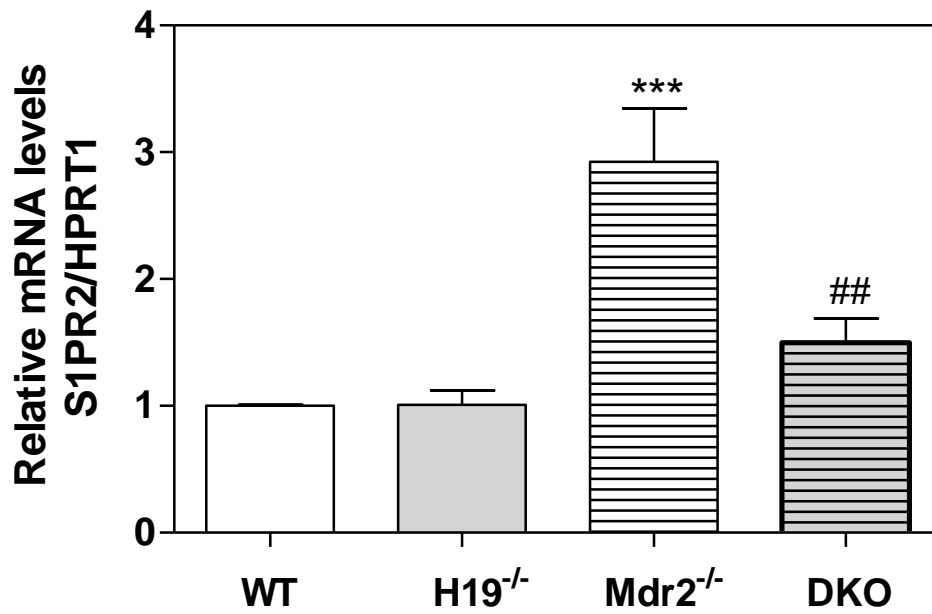

# Supplementary Figure 13

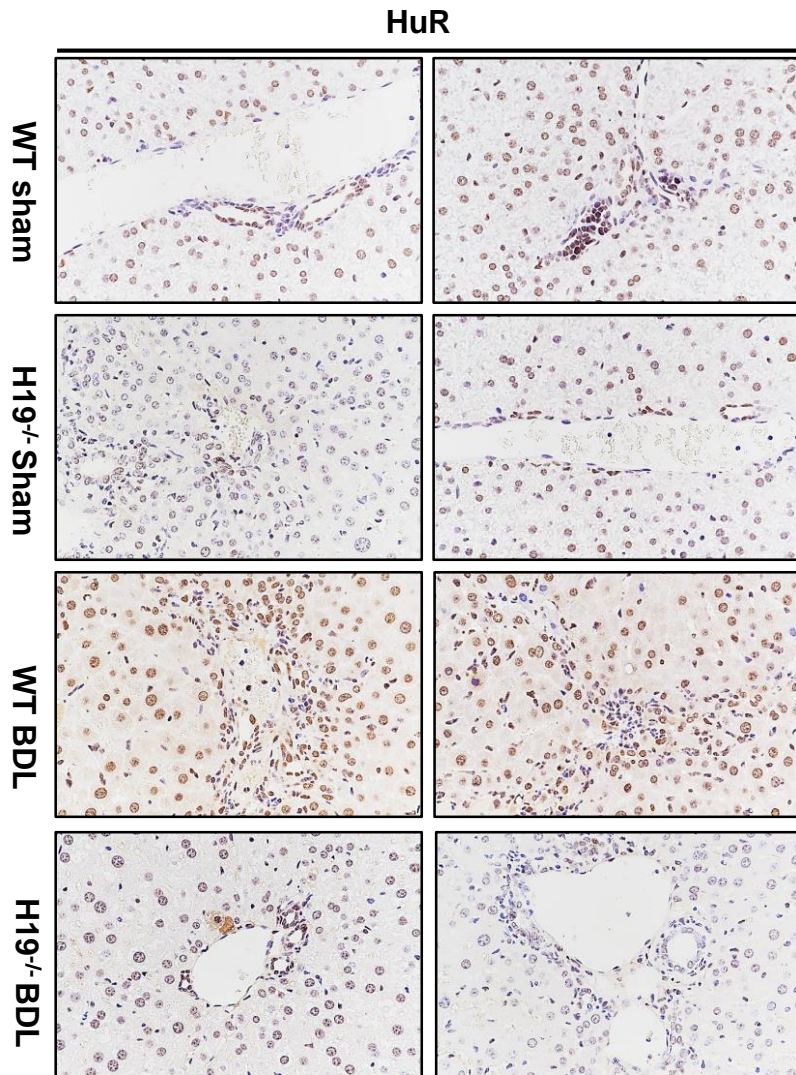

## Supplementary Figure 14

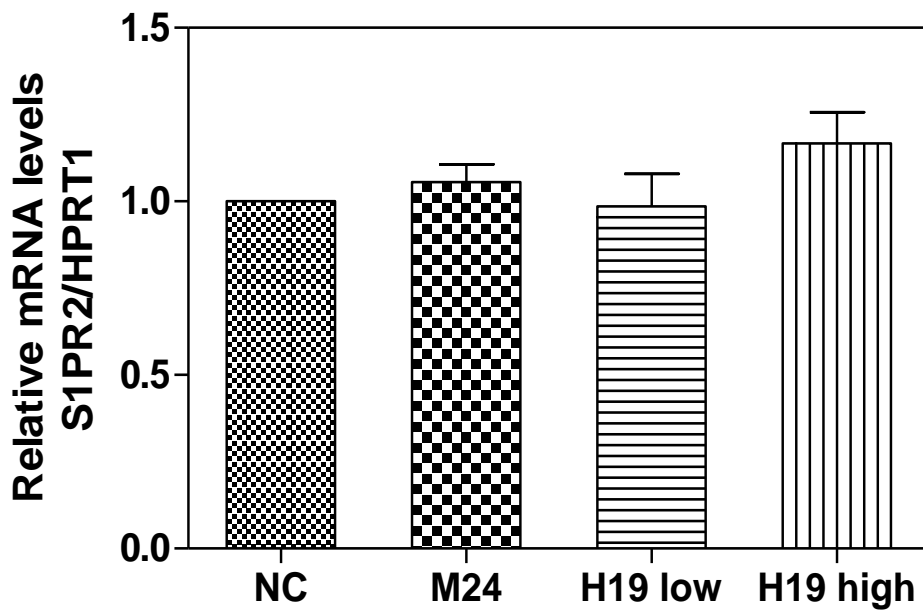

Supplement: NIHMS1037921-supplement-Figures.pdf [file NIHMS1037921-supplement-Figures.pdf]
